# Supplementary material for: Improving the Angiogenic Potential of EPCs via Engineering with Synthetic Modified mRNAs
Source: PubMed Central journal article supplement — Mol Ther Nucleic Acids. 2018 Sep 13;13:387–98. doi: 10.1016/j.omtn.2018.09.005 (PMC6198099; doi:10.1016/j.omtn.2018.09.005), 2018-09-13
Supplement: mmc1.pdf [file mmc1.pdf]

**OMTN, Volume 13**

**Supplemental Information**

**Improving the Angiogenic Potential of EPCs  
via Engineering with Synthetic Modified mRNAs**

**Heidrun Steinle, Sonia Golombek, Andreas Behring, Christian Schlensak, Hans Peter Wendel, and Meltem Avcı-Adalı**

## Supplementary Figures

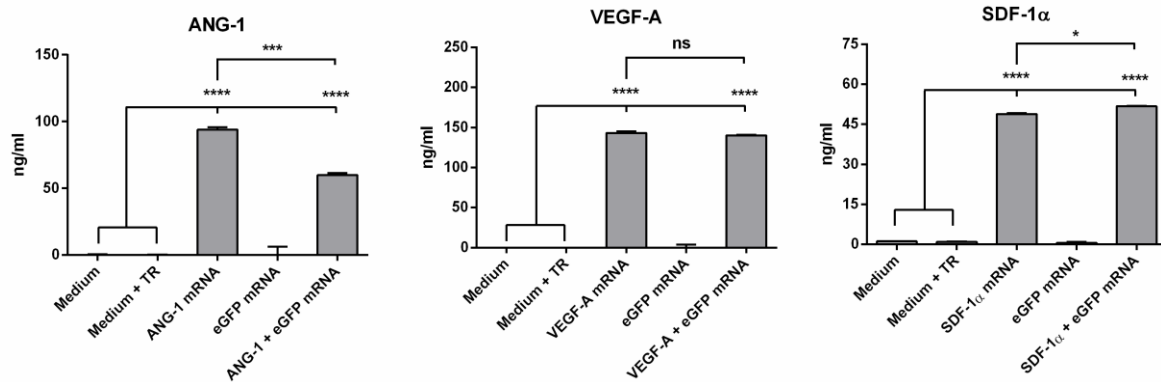

**Supplementary Figure 1: Influence of mRNA amount on protein translation.**  $1 \times 10^5$  murine EPCs were seeded and transfected the next day with  $1.6 \mu\text{g}$  ANG-1,  $0.8 \mu\text{g}$  VEGF-A,  $0.5 \mu\text{g}$  SDF-1 $\alpha$ , or  $2.9 \mu\text{g}$  eGFP mRNA. Additionally, cells were transfected with proangiogenic mRNAs and eGFP mRNA, which was used as filler mRNA, to reach a total amount of  $2.9 \mu\text{g}$  mRNA. The protein expression was analyzed in supernatants 24 h after the transfection using ELISA. Cells treated with only medium, eGFP mRNA, or medium and transfection reagent (TR) served as negative controls. Results are shown as mean + SEM ( $n=3$ ). Statistical differences were determined using one-way ANOVA followed by Bonferroni's multiple comparison test (\* $p<0.05$ , \*\*\* $p<0.001$ , \*\*\*\* $p<0.0001$ , n.s. not significant).

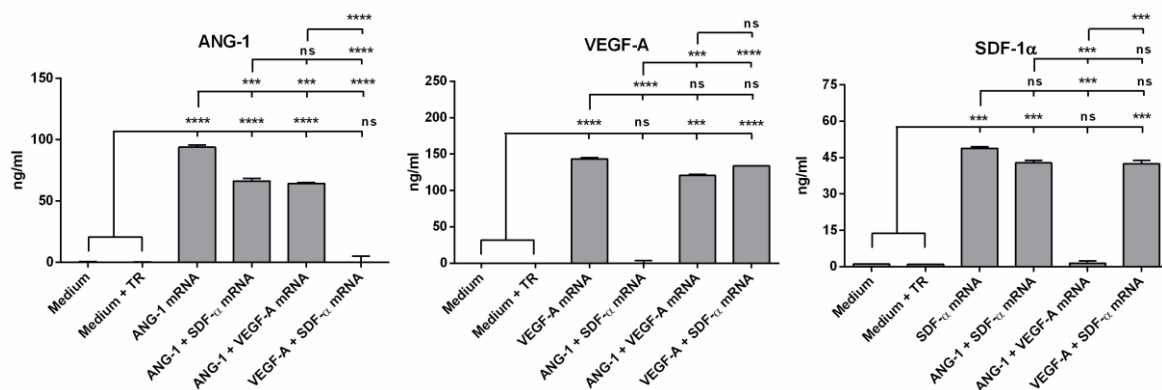

**Supplementary Figure 2: Influence of double proangiogenic mRNA combinations on protein synthesis.**  $1 \times 10^5$  murine EPCs were seeded and transfected the next day with  $1.6 \mu\text{g}$  ANG-1,  $0.8 \mu\text{g}$  VEGF-A,  $0.5 \mu\text{g}$  SDF-1 $\alpha$  mRNA, or with double mRNA combination cocktails:  $1.6 \mu\text{g}$  ANG-1 +  $0.5 \mu\text{g}$  SDF-1 $\alpha$ ,  $1.6 \mu\text{g}$  ANG-1 +  $0.8 \mu\text{g}$  VEGF-A, or  $0.8 \mu\text{g}$  VEGF-A +  $0.5 \mu\text{g}$  SDF-1 $\alpha$ . The protein expression was analyzed in supernatants 24 h after the transfection using ELISA. Cells treated with only medium, or medium and transfection reagent (TR) served as negative controls. Results are shown as mean + SEM (n=3). Statistical differences were determined using one-way ANOVA followed by Bonferroni's multiple comparison test (\*\* $p < 0.001$ , \*\*\*\* $p < 0.0001$ , n.s. not significant).

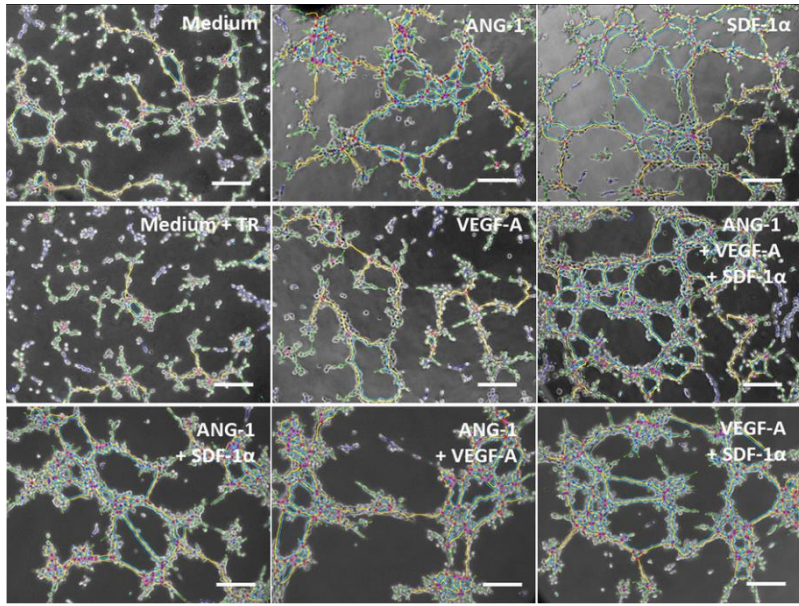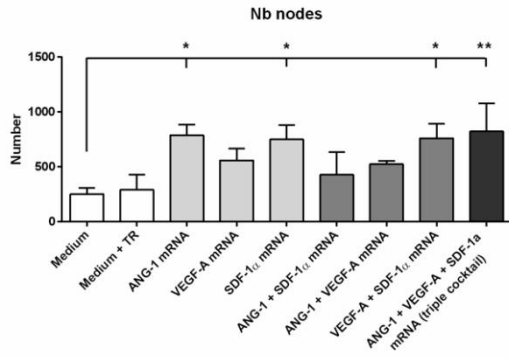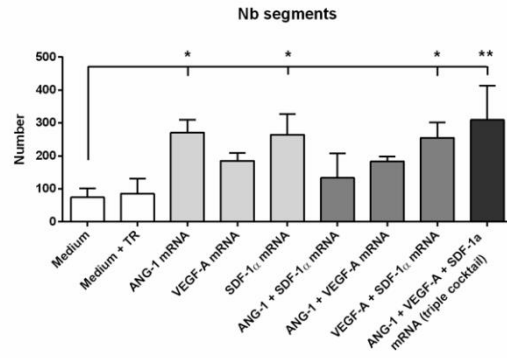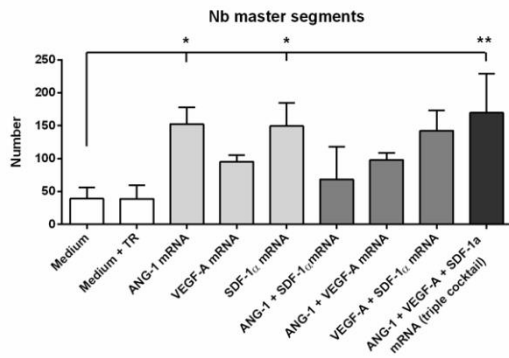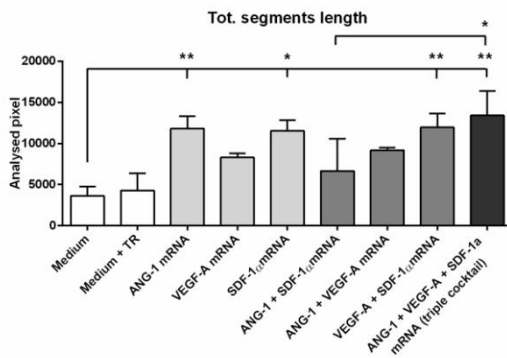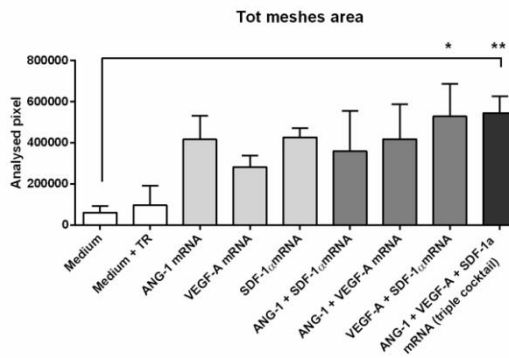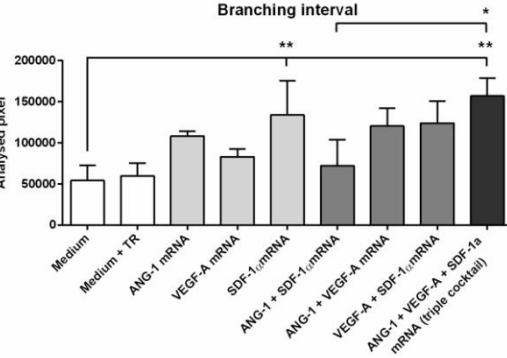

**Supplementary Figure 3: Influence of double proangiogenic mRNA combinations on tube formation.**  $1 \times 10^5$  murine EPCs were seeded and transfected the next day with 1.6  $\mu\text{g}$  ANG-1, 0.8  $\mu\text{g}$  VEGF-A, 0.5  $\mu\text{g}$  SDF-1 $\alpha$  mRNA, or in double mRNA combination cocktails: 1.6  $\mu\text{g}$  ANG-1 + 0.5  $\mu\text{g}$  SDF-1 $\alpha$ , 1.6  $\mu\text{g}$  ANG-1 + 0.8  $\mu\text{g}$  VEGF-A, 0.8  $\mu\text{g}$  VEGF-A + 0.5  $\mu\text{g}$  SDF-1 $\alpha$ . The angiogenic potential was assessed by tube formation assay and analyzed with ImageJ software. Cells treated with only medium, or medium and transfection reagent (TR) served as negative controls. Results are shown as mean + SD (n=3). Statistical differences were determined using one-way ANOVA followed by Bonferroni's multiple comparison test (\* $p < 0.05$ , \*\* $p < 0.01$ ).
